# Supplementary material for: Interruption of an MSH4 homolog blocks meiosis in metaphase I and eliminates spore formation in Pleurotus ostreatus
Source: PLoS One. 2020 Nov 4;15(11):e0241749. doi: 10.1371/journal.pone.0241749 (PMC7641404; doi:10.1371/journal.pone.0241749)
Supplement: S5 File — Sequence of the “insert” homolog region on scaffold 1 of the WT P. ostreatus strain (Sp+hap2). (GBK) [file pone.0241749.s013.gbk]

LOCUS       PC15_scaffold_01_insert_region     35524 bp    DNA     linear   UNA 
FEATURES             Location/Qualifiers
     LTR_copia_1     87..734
     LTR_copia_1     complement(2218..2865)
     copia_1         complement(2865..3859)
     Insert          complement(9389..18955)
     LTR_copia_1     9812..10458
     C5xC6           complement(11060..12660)
                     /label="Orf containing CxC5/CxC6 motif"
     CxC6            complement(11660..11851)
                     /label="CxC6 cystein cluster motif"
     CxC5            complement(12281..12652)
                     /label="CxC5 cystein cluster motif"
     LTR_copia_1     12660..13318
     C5xC6           complement(13309..13906)
                     /label="Orf containing CxC5/CxC6 motif"
     repeat_unit     complement(16216..16224)
                     /label="BC5NWY_signature"
     repeat_unit     complement(17213..17221)
                     /label="BC5NWY_signature"
     repeat_unit     complement(17321..17329)
                     /label="BC5NWY_signature"
     repeat_unit     complement(17352..17360)
                     /label="BC5NWY_signature"
     repeat_unit     complement(17353..17361)
                     /label="BC5NWY_signature"
     repeat_unit     complement(17381..17389)
                     /label="BC5NWY_signature"
     repeat_unit     complement(17382..17390)
                     /label="BC5NWY_signature"
     repeat_unit     complement(17392..17400)
                     /label="BC5NWY_signature"
     repeat_unit     complement(17402..17410)
                     /label="BC5NWY_signature"
     repeat_unit     complement(17412..17420)
                     /label="BC5NWY_signature"
     repeat_unit     complement(17430..17438)
                     /label="BC5NWY_signature"
     repeat_unit     complement(17431..17439)
                     /label="BC5NWY_signature"
     repeat_unit     complement(17441..17449)
                     /label="BC5NWY_signature"
     repeat_unit     complement(17460..17468)
                     /label="BC5NWY_signature"
     repeat_unit     complement(17480..17488)
                     /label="BC5NWY_signature"
     repeat_unit     complement(17490..17498)
                     /label="BC5NWY_signature"
     repeat_unit     complement(17520..17528)
                     /label="BC5NWY_signature"
     repeat_unit     complement(17540..17548)
                     /label="BC5NWY_signature"
     repeat_unit     complement(17559..17567)
                     /label="BC5NWY_signature"
     repeat_unit     complement(17568..17576)
                     /label="BC5NWY_signature"
     repeat_unit     complement(17577..17585)
                     /label="BC5NWY_signature"
     repeat_unit     complement(17587..17595)
                     /label="BC5NWY_signature"
     repeat_unit     complement(17617..17625)
                     /label="BC5NWY_signature"
     repeat_unit     complement(17646..17654)
                     /label="BC5NWY_signature"
     repeat_unit     complement(17647..17655)
                     /label="BC5NWY_signature"
     repeat_unit     complement(17696..17704)
                     /label="BC5NWY_signature"
     repeat_unit     complement(17716..17724)
                     /label="BC5NWY_signature"
     repeat_unit     complement(17726..17734)
                     /label="BC5NWY_signature"
     repeat_unit     complement(17746..17754)
                     /label="BC5NWY_signature"
     repeat_unit     complement(17755..17763)
                     /label="BC5NWY_signature"
     repeat_unit     complement(17765..17773)
                     /label="BC5NWY_signature"
     repeat_unit     complement(17794..17802)
                     /label="BC5NWY_signature"
     repeat_unit     complement(17795..17803)
                     /label="BC5NWY_signature"
     repeat_unit     complement(17805..17813)
                     /label="BC5NWY_signature"
     misc_structure  17821..17865
                     /feature_type="Small_direct_repeat"
                     /label="Small_direct_repeat"
     repeat_unit     complement(17834..17842)
                     /label="BC5NWY_signature"
     repeat_unit     complement(17853..17861)
                     /label="BC5NWY_signature"
     repeat_unit     complement(17872..17880)
                     /label="BC5NWY_signature"
     repeat_unit     complement(17873..17881)
                     /label="BC5NWY_signature"
     repeat_unit     complement(17883..17891)
                     /label="BC5NWY_signature"
     repeat_unit     complement(17902..17910)
                     /label="BC5NWY_signature"
     repeat_unit     complement(17931..17939)
                     /label="BC5NWY_signature"
     repeat_unit     complement(17941..17949)
                     /label="BC5NWY_signature"
     repeat_unit     complement(17942..17950)
                     /label="BC5NWY_signature"
     repeat_unit     complement(17960..17968)
                     /label="BC5NWY_signature"
     repeat_unit     complement(17970..17978)
                     /label="BC5NWY_signature"
     repeat_unit     complement(17989..17997)
                     /label="BC5NWY_signature"
     misc_structure  18020..18060
                     /feature_type="Small_direct_repeat"
                     /label="Small_direct_repeat"
     repeat_unit     complement(18028..18036)
                     /label="BC5NWY_signature"
     repeat_unit     complement(18047..18055)
                     /label="BC5NWY_signature"
     repeat_unit     complement(18066..18074)
                     /label="BC5NWY_signature"
     repeat_unit     complement(18067..18075)
                     /label="BC5NWY_signature"
     repeat_unit     complement(18096..18104)
                     /label="BC5NWY_signature"
     repeat_unit     complement(18108..18116)
                     /label="BC5NWY_signature"
     repeat_unit     complement(18136..18144)
                     /label="BC5NWY_signature"
     repeat_unit     complement(18176..18184)
                     /label="BC5NWY_signature"
     repeat_unit     complement(18273..18281)
                     /label="BC5NWY_signature"
     repeat_unit     complement(18302..18310)
                     /label="BC5NWY_signature"
     LTR_copia_1     complement(22801..23446)
     copia_1         24232..30213
     LTR_copia_1     24232..24879
     LTR_copia_1     29567..30213
     CDS             complement(30968..31183)
                     /frame="0"
                     /source="JGI"
                     /name="e_gw1.01.157.1"
                     /proteinId="1033156"
                     /exonNumber="4"
     CDS             complement(30968..30970)
                     /frame="0"
                     /source="JGI"
                     /name="e_gw1.01.157.1"
     CDS             complement(31237..32015)
                     /frame="2"
                     /source="JGI"
                     /name="e_gw1.01.157.1"
                     /proteinId="1033156"
                     /exonNumber="3"
     CDS             complement(32163..32930)
                     /frame="2"
                     /source="JGI"
                     /name="e_gw1.01.157.1"
                     /proteinId="1033156"
                     /exonNumber="2"
     CDS             complement(33136..33463)
                     /frame="0"
                     /source="JGI"
                     /name="e_gw1.01.157.1"
                     /proteinId="1033156"
                     /exonNumber="1"
     LTR_copia_1     34568..35214
ORIGIN
        1 CGTAATGATT GAATATTAAT TGGGTATTGG GCTTGTAAGT AAGCAAACAA TATAAGTCAT
       61 TGTTTACCCC ATATTGAGCA TCTATTTGTT AAAGTGATGT GCACACTTGT TGTACAAATG
      121 TATAACAAAG TTGCGCTGCA TAAGTGCCCG GTTCCCACAC ATTGGGGACC ATCCATAGAC
      181 ACTGCCAACA TCCATTGGGA CAGCCCAGGT CATCATGGGA TGACTGGTGT TGACAGGATT
      241 GCTAAAAGTG CACAAGCACT GTTTAGCAAT CTGTACATAC TTTACAAGCG CACGACTCCC
      301 ACGGTCAATG CAACATTCCC ATGTTCAGCG CCCCATTAGT AGGTCTGTTG ACCTCTATTG
      361 TGACGGCCGG AACAGGCACC AGAACGCCTC AGCCTCCACA GGGAAGCAAA AGCAGCAAAA
      421 ATGAAACATG GAGCCATCAT TAGAATGATG TCTGGCATGT TCCCAAGCTG CTCCGGAGCT
      481 AATCAAATTT GGACGCGATT TAGTGGACAC CTATATTCAC GCCTCGCGCA GAACAGTACC
      541 CGTGGAAACT TTGGATGGAC ATTTTCCATA CATGTCTACA GTAATAGACA CAAAGAGTCA
      601 ATAGAGCGCA AATCATTACA TATTATTGAT TGATTGCATC AACACATCAT TAGTGATTGT
      661 TACCAAGGCA ATTAGAGTGC ATTAGGATGC TTCTACAAGC TTCTGATCAA ACTATAATAG
      721 CCTAAAGTTT AACAGATACT ACTCCGTTGC CTGCACCTAT GTTTGCTAAC TTTGACGACT
      781 ACCTCCCACC TTCCTCTCTC ATCGCCGATG ATGTCAACGA CTTGCAAGGT GCCTCTCGTA
      841 CCATGGGTTG ATTTGCAAGG GGCAAGGGCC ATGGAGTAGT TCCCAACATG GCTGACTTCA
      901 GTAAGTTCTT GCTTGTCATA TTCAGCTCAG CTACTGACTC CTGCTTAGAC ATCCAGCCAG
      961 CAGACCTTGT CTGTAAGGGC AACCTCAAGA TGGCCGACAG CGCAGGCCTA GCAGAGGGAG
     1021 AATCCAAAGT AATGAATAAG ACTAACTACA ATACATGAGA GAGCTGCTCA CCTAGCAGAG
     1081 GGAGAATCCA AAGCGAACAG GATAAGGATT CTCCATGCTA GGAAGCGAAG TATATACTGT
     1141 AGTAGTGTGG GAGGAATGAA GGGTAAGGGT ACAGTACACC AGCCACAAGT CCGAGCGAAT
     1201 ATCACAAGGT ACAAGGAAAC ATGTGATAAT GAAGTGGAGG GTAAATGGAC AGGAGTCGTG
     1261 CCAGCGACTT GGGGGAGTAA GGGCGAAGAG TAATGAAGTG GGGGAAAAGG ATAGAGGTAA
     1321 CCCGGACGAG CCCCGAAGAG TATAGACGAG TCCGAGCGAG TCCGAAGTGT CCGAAACGAG
     1381 TTCGAGCGAG TCTGAAGTGT CCGAAGTGCG GGAAGACTCC GGAGTCACCG GACGCGGCTC
     1441 GGATGCGAAA GGAGTGGGTG GAAAGGAAGT GGAAAGGAAA GGGAGCGAAA AGGAACGAAG
     1501 GGAAATGAAG GGAATGTAGG TAAGAGTCCA TGGGATGAAG GAAAGGAGAG AAAATAGGAG
     1561 TGTCCCCTTA CATTGTCCCT GTCCGCAATG AGGGCAGAGT CTTGGTGTAC AAGAATGTGG
     1621 ACCGCACCAG CGCTAAGGCC CGTGCTGTGA GGGTCCCTTT GGCTTACACC TTGGGGCCTG
     1681 TCCTCAAGGC TATGGTCAAG AAGATGACCA CTCTTGCAGG TATGTCCCAC ATTTTGACTT
     1741 CGCGTTTTTT GCTTACCATT TGTTGCCACT TAGACTCCGA CATCTCGTTG TGGGTCAAGG
     1801 ATGACTGGGA GATGAAGGGC CCATTTGCTG TGGTTGTTCA GGGGGATGAG CCCATTGAGT
     1861 AGGACAACAA CAAGGGAATG GAGTTGTTAA TGGTAAGCAA AATCCGACTT GACTTGAAAA
     1921 AATTCTGACT CTATCTCACT CAGGACCCTT CAATCCAAGG CTCTGGCTTC CATCCCCCTC
     1981 CCTCCCCTTC TGTTTACTCC GCTGCTGCCC CATCAAGCAT CTCTTCCCTT GCTCCCTCTG
     2041 CCTCTGTCTC CACTGCTGGT GTCGACACTG CCTTGCTTAC CATTGCCCAG CAACTCGCCA
     2101 GCACCTTCTC TGATCCTGCC CTGCTTCAGC TCGCCATCAT GCTAAAGGGC ACCTTTAGCA
     2161 TGACACCCAA GGCATCTGGC AAAGGCAAGA TCCTTCAGAT CTTTGCTAGG ATGAAGGTGT
     2221 TAAACTTTAG GCTATTATAG TTTGATCAGA AGCTTGTAAA AGCGTCCTAA TGCACTCTAA
     2281 TTGCCTTGGT AACAATCACT AATGATGTGT TGATGCAATC AATCAGTAAT ATGTAATGAT
     2341 TTCCGCTCTA TTGACTCTTT GTGTCTATTA CTGTAGACAT GTATGGAAAA TGTCCATCCA
     2401 AAGTTCCCAC GGGTACTGTT CTGCGCGAGG CGTGAATATA GGTGTCCACT AAATCACGTC
     2461 CAAATTTGAT TAGCTCCGGA GCAGCTTGGG AACATGCCAG ACATCATTCT AATGATGGCT
     2521 CCATGTTTCA TTTTTGCTGC TTTTGCTTCC CTGTGGAGGC TGAGGCGTTC TGGTGCCTGT
     2581 TCCGGCCGTC ACAATAGAGG TCAACAGACC TACTAATGGG GCGCTGAACG TGGGAACGTT
     2641 GCATTGACCG TGGGAGTCGT GCGCTTGTAA TGTATGTACA GATTGCTAAA CAGTGCTTGA
     2701 GCACTTTTAG CAATACTGTC AACACCAGTC ATCCCATGAT GACCTGGGTC GTCCCAATGG
     2761 GTGTTGGCAG TGTCTATGGG TGGTCCCCAA TGTGTGGGAA CCGGGCGCTT ATGCAGCGCA
     2821 ACTTTGTTAT ACATTTGTAC AACAAGTGTG CACATCACTT CAACAGAGTC TAGTGTCAAT
     2881 CCAACCACCA TTTCATCTTT AATCATCTGC TTAATTCCGT CATGGTGTTG GTGGCCAAGC
     2941 CGTCTATGCC ATAGAGTCAG ATCCAAAGGC AGAGTGGACG CAACATGAAC AAATTCATTT
     3001 GTGTCTATTG TACTACCATC TAAATGGCCT ATACCAGCAT TATTGATTGT AGCACAGAAC
     3061 AAAAGAACAT CATTATGAAC AAACTCCATT TTATCCTTTG TGATATGAAC ATTAAAGCCT
     3121 TTATTTCGAG TCAAATACAA AACAGCAAGC AGATTATTGC ACAATGCAGG AACATGGAGT
     3181 ACTCTAGTGA TCTCCACATC TCTAACTTGT CTACCATTAA CTACAGGTCT GAAGAGCACA
     3241 TTTCCGACGC CCTCACTATA TACAATGGTG TGATCCGGTA GCCTAATTGG CACTCTATAT
     3301 GTGGTATAAT TGTGAATCCA TTCTTTGTGA GGTGTCATAT GAGAAGTGGC CCCTGTATCT
     3361 GTATTCCAAT GGGTATCATT AGAAAATGCA GCACAAGCTT CATTCATAGA ACGAGCACTT
     3421 GCCTGACCAG CAAACTCTGT CGCAGCATCT GCCTTTTCCA CTGCCACTTT GGCATTGCTC
     3481 CCCCCAGATC CACTTTCTTT GTTGCTAGCA ATGACCTTCT TCAAAGCCTC GCAATCCTTC
     3541 TTCAAATGAC CCTTGCCCTT GCAGAATGAG CAGGTGTCTG CATCAACTGT GGGGTGACCT
     3601 CTGCCTTTCC CATTATAAGC CCCACCCTTC TTTCCATAAC CCTGATGACT GGCTCTATTC
     3661 ACTTGCTCAG TCTGGCGCTG ACAGTTTAGC TCTTCGCTTC GGAATGCTTG GAGTATAGTG
     3721 TCTTTGTCCA GCTTTTCCAT TAGCAACAAA GAAGCTGACA AGTGCTTGTA TTCATCAGGC
     3781 AAAGCCCGAA TCAATGCCAT GCACTGTAGT TCCTCGTCTA ACTGCTCAAT GGTAAAGCCT
     3841 GTTGGACGCA GATTTTGGAG CACCTGACGG TTTACCACAT TTATACATGA AGCTCATATG
     3901 AGCTTTATAT GAAGTCATAT GCTTTATATG GACTTTATAT AAGCTTCATA TAGAGAAAAT
     3961 GTAAGTATAT GTTTCATAGG AATGGCAGGA AAATCTTTAC ATTTATTCTA CTTGCTTTAC
     4021 ATTTCCTTTA CATTTCCTCT ACATTTCTTT TACATTATCT ATATATAGTA TGTGAGCTTT
     4081 ATATAAGATT TATGTAAATA TTTATATGCA ATGCACATGA AGTTCACATG AAGTAGATTT
     4141 GATGGAGACA TAATTATGAA AGATACACAT GCTTCGTATG AATTTACATG GATTTATATG
     4201 AATTTGTATG AATTTGTATG AATTTACATG GATTTATATG GATTTACATG AATTTATATG
     4261 GATTTATATG GATTTATATG GATTTTCTGC AATTTATTGG AGGTTTTCTG AGGCAATTTC
     4321 CGCTTTGGGA CGTCCAAAAA TGAGTTAGCA AGGGTTATCC GATGATCACT CATTTTTTTC
     4381 CGGACGGGCG CTTATTGGGC GCTTTACCAC GAATATTAAT ATTCTTTTTA TTTTATTTTA
     4441 CTTTTCTTTT TTATTTAGGC GCGCGCCTAT CCGGCAATCG CCGTGATGCC ACACGCATGT
     4501 GACAGTGGCG TGCCACGCTG GCACTGCCAC CTTCTTTCTT CTCAACCACC ACCATCCCCT
     4561 CACTTTTCAC CCAACCCACA CACACGGAAT GCCCCCAAGA GCACCACGAA GCACCCAGAA
     4621 GGCGTCCACG CGCGGCGCAG GGAACGAGGA GGAGGGCCAG GGAATGTAAG TCACCCTGCC
     4681 CCTTCCTTTT GTCAAAACTG ACAGCCCCCA CCCCTTCCCA CCACCCCCAC TTCCCTCTCG
     4741 TTCCATTTCC CAATGGCAAC CACGCCCCCG CGCCCTCGTC GTCGCTCCCA CGCCCTCGTT
     4801 TTCGCCCTCG TTGTCGCCCC TGCGCTCCTG CGCCCTTGTT TTCGCCACTG CGCACTCATT
     4861 TTCACGCTCG TCGTCACCCC TGCGCTCCCG TGCTCTTGTT TTCGCTCCCG CGCGCTCATC
     4921 TTCGCCCTTG TCGTTGCCCC TGCGCTCCCG CGCCCTCATT TTCGCCCCTG CGCCCTCGTC
     4981 GTCGCTCCCA CGCCCTCATC TTCGCCCCCT GTGCCCTTGT TTTCTCCCCT GCGCCCTCAT
     5041 CTTCACCCTC ATCATCGCCC CTGCGCCCTC ATCTTCACCC TCATCATCGC CCCTGCACTC
     5101 CCGCGCCCTT GTCTTCGCCC CCGCACCCTT GTTGTTGCCC CTGCCCTCCC GCGCCCTCGT
     5161 CTTCACCCCC CGCACTCTCG TTGTCACCCA CCACCCACCC CCGCACCTTT GTCATCGCCT
     5221 ACCACACGCC CACTACATCC CCATCACACA CCCCTGCACT TGTGTTGTCA CCTACCATGC
     5281 CACCGCACCT GCGTCTCACC TGTTGTTGCT CAACAGTGCC ATCAAGCCCA GGTCCACCAG
     5341 ATCAGCCACT GCTGCTGCCA AGGCAGTACA AGAGGCTTCT CAAGAGACAG AGTAAGTACA
     5401 TCACTCTTTT ATCAGTAGCA TAGATGTAGA GTAGTAGTAT TATTAAAATA AATAAATTTC
     5461 TTTTCAATTC ACAAAAAAAA ATCTGAACAA TGTTTGATAG AGATGAAGAT GAAGAAGAGC
     5521 AGCCAGTCAA GAAGTCCCAT GTGTCTGCTG CAAAGAAAAC CATGAAAACC AAGAAAGACA
     5581 AGAAGTATGT ATCACTTACT TGCTTGCTTG TACCAGTTGC TGACTTCCAA TATTTATAGG
     5641 ACCTCTGCCG ACCGTGATGC AGAGGACAAG GCTGCGAAAG CAGTTGCTAA GAAGAACATG
     5701 ACACTGTACG TATTGATATA CTCATCATGA TGCCTGCACC GTACTAATTA ACTATAGTAC
     5761 GTCTAGAATC CTCCAGCAAA GTGGGGCTGG TGTAGCTCCA CCGCCTCGCT CCACTGGCAC
     5821 AGGGATTCAG ATCCCTTCCA CTACCCCGTG CATTGTCTCT GACCGTGCAC GTCGTCCTGA
     5881 TCCCGGCTCA GGTGACGATG AAGATCCACA GGTCAACGCC GGTTCCAAAG ACGACTCAAA
     5941 CTCTGGTGAT GAAGAAGAAC TTGCTGTGGT CAAGGATAAG GGTAAGGGTA GAGCTAGAGA
     6001 CTTGCACAAC CTCGGTGCAG AGTCAGACAA GGAGTCGGAG GCTGATGCGG ATGTGGAGGA
     6061 TAAAGAGAAT GACGATGAAG ATGTTGATGA AGAGGCCGCT GGAGCTGCTG AGGGTGAAAT
     6121 TGCTGGTGTG GGTGATGGAA GTGATGACGA GGAGGGTGAT GCGACAATCA TGGATGTTGA
     6181 TGTCAATGTC ACTCCTCACA AGCCTGCTAA ACGTGATGCT AGCCAGTCCC CACTCACTGA
     6241 CAAGCACACT GGTAAGGCTC AGCGCCGTAA CGTCTCTCAC TTCAGTGCTG CTTCCAGTGC
     6301 TGCTTCTCTC CCAGCGCCTT CTCACTCGCC CTCTCCACCC GACAACTTGC AGGAATTGCA
     6361 GGGCGCTTCG CGGACCACTG GTGGCTTCGC ACGTGGTAAC GCCTTTGGTA CTGCGCCCAA
     6421 CATGGCTGAT TTTGGTGAGT CTCTCAACTT CACTTCCTCT GCTTTGCACT TACCTTCAAT
     6481 CTAGTTCCTG TTGGTGATGT CCCGCTCATC GAGACTCATG GTAAGGGCAA GGTAGTTATG
     6541 TACACCACCT TGGGGATGAC CGACAAGCCC CACTCTGTAA CCATGGCCCG CTTTCCTACG
     6601 CTGGCACCAA TCCTCAAGAT CCTGACTAGG AAATTTCCAA CTGTGACAGG TTAGTTATTG
     6661 AACTCCCTTC TCGCCTAATA TGCTTGCTGA TCTGAGTATG TAGAGTCTGT AAGGGCAACC
     6721 TCAAGATGGC CGACAGCGCA GGCCTAGCAG AGGGAGAATC CAAAGAGAAT GAATAAGACT
     6781 AACTACAATA CATGAGAGGG CTGCTCACCT AGCAGAGGGA GAATCCAAAG AGAACAGGAT
     6841 GGGGATTCTC CATGCTAGGA AGCGAAGTAT ATACTGTAGT AGCGTGGGAG GAATGAAGGG
     6901 TAACTGTACA GTACACCAGC CACAGGTACG AACGAATATC ACAAGGTACG AGGGGGCATG
     6961 TGATAATGAA GTGGAAGGGG AATGTACCGG AGTCGTGCCA GCGACCTGGG GAAGTGGGGA
     7021 CAAGGGGTAA TGAAGTGGGA AAGCAGGATA GAGGTAGCCC GGATGAGCCC CGAAGTGTAT
     7081 CTACGAGTCC GAGCAAGTCC GAAGTGTCCG AGCAAGTCCG AGGCGAGTCC GAAGCGCGGG
     7141 AAGACTTCAG AGTCACCGGA CGGGGCTCGG ATGCGAAGGG AGTGAACGGA AGGGAAGCGG
     7201 AAAGGTAAGG GGGCGAGAGG GAAGGAAAGG GAATGAAGGA AGGGAGAAAG GAAACGAAGG
     7261 AGGAAGGGAG AGGGACAGGG GAATAGGAGA AAATAGGAGT GTCTGTCCCC TTACAGAGTC
     7321 TGCTCTTTCC ATCTTGGATG TTGATGGGGA ATGGGAGGTT GCTGGCCCTT TTGCCCTTGC
     7381 GCTGGAGGAT GACATGGATG TGACTTGGAA TAATGACTTC AAGTTGCTCA TGCTTTTTTT
     7441 GGTAAGCTTG TCTCCATCTG TGCCTGAGCA CTTCTAACTT CACAAAATCA GGAGCCCCTC
     7501 CCTGCAGTGT CTACTTCTGC ATTTCCCGCC TTTCCTCCTT CCCTCATCTC AAGTCACCCC
     7561 GGCAGCTCAG TTGCCCACTC TGGTGGCTCT ATTGCACCCT CATCTGTTGC ACCCTCAGCC
     7621 TCCATCTCAT CTGTCAGTGT CGCTACTGCA GGCACACTTC CACCAGCTCC AGATCACATC
     7681 TGTGCAGCTT ATTCCACCAA GCAGCACCTG ATCCCGTACG CTGTTCTTCT TGAGGTCCCA
     7741 GTCTCCTTGG TTCCTAACAC CAAGCCCAAC GATGGGGACA TCATATCGGC ATATGAACAC
     7801 TGGAAAGCTG CCAGCACTGC TCGAGAACGA CTCAAGGCCA AATATGACGC TCACGATCCC
     7861 AAATCCCCTC CTCTTCCTCC CTTTCCAAAT GTCGAAAACA CTCGCGCCAT CTACATGAAT
     7921 CCCAGCAGCT TCAGCAACTA CAATTCCCTC TTTCTGGCTG CCATTCAGCA TCCAGATATT
     7981 CTCACATATC TGGAGGGTGA TGCTGGAGTG GGCTCGGCCA TCTACAAGAA ATTGTGGGGT
     8041 GCAGTCAAGC CTGGCAAGGC TACCTTGGGC CAACTGGTGG AACGGATCAA CACTGAGCAG
     8101 AAGAAGGAGG AGAAGAGGTC TGCAAAGAAG AAGGCTGGGC CATCCAAATC GAAGTAAGTC
     8161 ATCAGCTTCA TACAACTTAG AATTTCTCCC TATGCATATA TCTTTGTACT ACTATATTTA
     8221 TTGAAAATTG CATATATTTT GCACCATTTC TTGCTTGAGT CTCAATTATA TTTTCTATCT
     8281 GAACACATGC TCATTTGCCT AGTTTCTGTT TACAGACCTA CATGATGCTG CTAGTGGTGT
     8341 GGTTCTTGCT TGGACTTGTT CCATGTGTTG CTGCAGCACC TAAACAAGAT CCATTTCCAA
     8401 ACATGCTCTT CACTGAGTTT GCTCAAAGCA TTCAGGACAA CTTTGGTCCC AAGATCAAGC
     8461 TGTCTACTGT CTTGATGCTT CTGATGACTC TTGTCAGTAA TACGGATCTC CTCAACCTTC
     8521 ATGGACAACA GCAGGCTTCT CAGCAACAGG AGTCTACTAG CTGGATGGCT GCCCTGGTCC
     8581 GTGCTGTCAA AGCAAAGCTC TCTGACAGTG GCTTTGTCTC CCTGTTCACC ACTGACGACT
     8641 TACGGACTTC ACAATCTGAG CAGCAGCAAA TTACGCTTGC AGGCAAGAAA CTCAGCCGGT
     8701 TCAGCCGCTC TCTGTCTCTT GCTTCACACT CCAGTATTGG GAATTTCAAG TCCAAACTCC
     8761 GCCCCATCTC CACTGCTTCT ATTCAACCCA TCATTCTTAT CACGCCCATC GTCATGGCTT
     8821 GTCCAACTCT TGACTGTAAC GACCATAGCC TTACTCAAGA CCTCCGGGAA CATGATATTG
     8881 CTCATGTCAC ATTGCTCAAG GGGAGTCAGT GCTTGGAGAA AGTCCCTGTT CTGGCTGGCA
     8941 GATGCTCTTC CTGCAATTCA CTTTACTGGG CAGATCACGA GCGGTTCACC CAGAACAACG
     9001 GTGATGACTT GTGCTTGTAC CTCAACAATG CCAAGTATCT CAAGGTTGGC AAAAGTGTCT
     9061 GGGTCGACCG CACTGTCTCT GGGGCTATCG TCAATGCCAA CTACAGCTTC CATGCTTCCA
     9121 CTGCTGCCAT TACCGAGTTT TGGAACTTCT CATTTGTCAA GCCAAGTGGA GGTACCTTCA
     9181 AACTTGGACG TCGACAAGTC TGGAAGGCCT TTGTGGAGGA GTCTATCCGG CAGATGGCTA
     9241 AGTTCAACAA GCGCCAGATT GTCTTTGAAG ACAATCTCTC CATCAATGCT CTGGTTGCTG
     9301 CTGCCTACAT TGAACTCGGC GACAATGGAG TTATCCGCAG TGCAGAGGGA CATTCTTGCG
     9361 ATGAGTGTTG CCATGCATTC AAGGATGGTA TATCTGGCAG TTCACCACGT CTACAAGTGA
     9421 ACACCAACTG AATCCAGTTG GTCTGGTTCA ACCAGTTGGA CACCAACTCA AGTCAACTGA
     9481 ACTACCAACT GAACACCAAC TCAACCAAGT AAGTTCACTT ACATTCAGTT CCGTTCAGTT
     9541 CCACACCAAG TGACTACCAC TTGAACACCA CTTTATATAG TTGGAAAAGT TTCAGTTGGT
     9601 GTCCAATTGA TGTCCAAGTG GTGTCCATGT GAACTGTGCA TAGTAGAGTC AGTAGAAGTA
     9661 GAAGAGATTG TTCAACTGGT GTTCAGTTGG TATTCAGGTG GGTTTCAAGT GGACTTTGGA
     9721 CTTTACAGAA TTTACACAAG TCCAAATGGT GTTCAAGTGA ACCTCACTTG GTGGTCAATT
     9781 GGGGTCAAGT GGTATGAGTT GGAGTACAAA CTGTTGAAGT GATGTGCACA CTTGTTGTAC
     9841 AAATGTATAA CAAAGTTGCG CTATACTAAG CGCCCTGTTC CCACGCATTG GGGACCACCC
     9901 ATAGACACTG CCAACACCCA TTGGGACGAC CCAGGTCATC ATGAGATGAC TGGTGTTGAC
     9961 AGTATTGCTA AAAGTGCGCA AGCACTGTTT AGCAATCTGT ACATATATTA CAAGCGCACG
    10021 ACTCCCACGG TCAATGCAAC GTTCCCACGT TCAGCGCCCC ATTAGTAGGT CTGTTGACCT
    10081 CTATTGTGAC GGCCGGAACA GGCACCGGAA CGCCTCGGTC TCAGCAGGGA AGCAAAAGCA
    10141 GCAAAAATGA AACATGGAGC CATCATTAGA ATGATGTCTG GCATGTTCCC AAGCTGCTCC
    10201 GGAGCTAATC AAATTCGGAC GCGATTTAGT GGACACCTAT ATTCACGCCT CGCGCAGAAC
    10261 AGTACCCGTG GGAACCTGGG ATGGTCATTT TCCATACATG TCTAGAGTAA TAGACACAAA
    10321 GAGTCAATAG AGCGCAAATC ATTACATATT ATTGATTGAT TGCATCAACA TCATTAGTGA
    10381 TTGTTACCAA GGCAATTAGA GTGCATTAGG ACGCTTCTAC AAGCTTCTAA TCAGACTATA
    10441 ATAGTCTAAA GTTTAACACA AACATGGTTA CAAGTGTCAC TATATTGGGG AGTGTTCAGT
    10501 TGGCTCCCAG TTGGTGTTCA AGTGGCCACC AACTGAATAC CAGCTGGGTG TGATCTTCTA
    10561 CAGATACAAG TCCAAGCATA CATTACAGTT GATATTCAAG TGGTATCCAA GTGGCAGCCA
    10621 GGTGGTGGCC AAGTGATATC CAGGTGGTGT CCAAGTGATG TCCAAGTGAT GTTCAAGTGA
    10681 TATTCACATG ATGTTCAATT GGTGTTCAAT TGTTGCTCAA GTGGTGTTCA ACTGAAGTTC
    10741 AACTGATATA CAAGTGAATG CCAAGTGAAC TACAAGTGAA CTACAAGTGA ATTTGCTCAT
    10801 ATTCAATCAT CATCATCCTG CATCTCTTGC AGCCCATATC TCACTCCATT CTCATCCTCT
    10861 TCATCCTCAC TTTCATCACC TGCTTCTTCT TCCCTTCCCT GCTGCCTGGC AATAACACGC
    10921 TGGGTGTGCA AGAACAGCAA CACATGCATG GTGAAGTCAA AGTTGCTGAC ACTCATCCGG
    10981 TTGAGGACTG TCTGGAACCC ACCCAGCCAT GCATTGAGTT GTTCACAAGC CTAAGTACAA
    11041 CAAATTAGAC AAGTACAAGT GGCTGACTAG TAGAATCACT TACCTGAGTG TTGAAGGCCC
    11101 TCTTGTAGTA CAGGTTGCCT TGTTTGTCTT TATCAACCAC CACCAAGTTG GGGGCATCTC
    11161 CATTGAGAGG TGCAGGGTTG CACCATGTCC GACAGAGGTG GTCAGTCACT CGGTGATTGA
    11221 TGTAGTGGTA AGAGTCGACA ATGATTCGAG TGGTGGGTTC CCAAGCAGGC CAGTGCCCTT
    11281 GCCTGACAAT ATGCTTGAGT AAGGCGCTCC CCTTGTCAAT GGCAATGTAG CTGGGGCGTG
    11341 AGGCAGGATC AGGATAGACA TCTTCAAGTA ACCGAAGAAT CTTGGCCACC TCTTCTGACT
    11401 TGGCAAACTT GCGCCAGGCA AGGACCACAC CACATGGAGC ACAGATGGTC TCCACACAGT
    11461 AGAACCTAGG AGCAGAGAAG TAGTTGTTAT ACTTGCTGCC ACTGACCTGT TCAACCTCCT
    11521 GCTCTGCAAG GTCGTCATGC TCTGGCAACT CTGCTCCTCC ACCAACAGGC AACCACTCCT
    11581 GCCTCTCCTC CTGAGCCCTC CTCAACATCC TCTGAACTCC CAAGAGTGAG GAGTTGGCAT
    11641 AGCGAGCCCG GTAGACCCTC CACTGCTCCT GGTGATTGAC ACATGCCTGA GTCCCAGCCA
    11701 CCTTGACTCT GACACAGTCT TTCATGCGAC AACGGACCCC CATCTCGTCC TGATGTGCCT
    11761 TGCAAAACAC TCCAGTCTGA GCATTAAGCA ATCCCACCTC GCACCCTGGC ATGGCACAGT
    11821 GACGAGGCCC CATGACAATG CCATCAATAA CAATCATGCG AACGTCAGCA GGATTGCTAA
    11881 GGGCAGCCCC CCCAGCAGGT TCAGATGCAT CACTGGCTGG GACATCATCA ACATCCATGG
    11941 CCTCAGCATC TTCCACAGCA GGGCCTGCAT ACTCTGGGAC AGCATGATTT TCATCATGGC
    12001 CAGCAAGAGC AGCAGGATTG TCAGGCTGAT TAGGGATCAC GTCAGCCACA TCCTTGAATG
    12061 CATGACAACA CTCATCGCAA GAATGCCCCT CTGCACTGTG GATGATTCCC CCATCTCCCA
    12121 GATACTCATA GGCAGCAGTC ATGAGGTCCT TGACAGCCAT GTTGTCCACA AAGAGGAGCT
    12181 CAGCACCACT AGGCTCAGCA AGCAACCGGA TGGACTCCAA GACAAAAGCC TTCCAGGTAT
    12241 GCCTGCGAGT GAGTTTGAAT GTGGTGCCAC TGGGCTGGAC AAAGGAGTAG TTCCAGAACT
    12301 CAGTTACTGC AGCTGTCGAG ACATGAAAGC TGTAGTTGGC ATTGACAATA GCCCTGGAGA
    12361 CCAGGCGGTC AACCCAGACC TGAGTTCCGA CTTTGAGGTA TTTGGCGTCT GGAAGGTGAA
    12421 TGGCAAGGCG GCGATTGTTA GAAGGGTCGT TGAAGCTCTC ATGGTCAGCC CAGAACATGG
    12481 AGGAACATGC AGGACATTTC CCTGCAAGTA CTGGAACCTT CTCAAAGCAC TCGCTCCCCC
    12541 TAAGCAAGGT GGCTTTGGAG ACATCACAGT ACCGCTGGTA CTGAGTCAGA GCACGACCAG
    12601 GACATGTAGC ATCGGAGCAT TGCATGACAG TGGGAGTGAT GATGAGGACA GGGCGAATAT
    12661 GTTGAAGTGA TGTGCACACT TGTTGTACAA ATGTATAACA AAGTTGCGCT ATACCAAGCG
    12721 CCCGGTTCCC ACGCATTGGG GACCACCCAT AGACACTGCC AACACCCATG GGAACGACCC
    12781 AGGTCATCAT GGGATGACTG GTGTTGACAG GATTGCTAAA AGTGCGCAAG CACTGTTTAG
    12841 CAATCTGTAC ATACATTACA AGCGCACGAC TCCCACGGTC AATGCAACGT TCCCACGTTC
    12901 AGCGCCCCAT TAGTAGGTCT GTTGACCTCT ATTGTGACGG CCGGAACAGG CACCGGAACG
    12961 CCTCGGTCTC AGCAGGGAAG CAAAAGGAGC GAAAATGAAA CATGGAGCCA TCATTAGAAT
    13021 GATGTCTGGC ATGTTCCCAA GCTGCTCCGG AGCTAATCAA ATTCGGACGC GATTTAGTGG
    13081 ACAGCTACTT TCACGCCTCG CGCAGAACAG TACCCGTGGG AACCTGGGAT GGTCATTTTC
    13141 CATACATGTC TAGAGCAATA GACACAAAGA GTCAATAGAG CGCAAATCAT TACATATTAT
    13201 TGATTGATTG CATCAACACA TCATTAGTGA TTGTTACCAA GGCAATTAGA GTGTATTAGG
    13261 ACGCTTCTAC AAGCTTCTGA TCAGACTATA ATAGCCTAAA GTTTAACAGA ATATTGGCAG
    13321 TGGAGATGGG AAGGCGCTTG CGACGCAAAG TACCTCTTTT GTTATGAGAG TAAAGATTGA
    13381 GAGAGCGACA AAAGAAGTCA AGCTTTTTAC CCAGAATAGT GGTCTGTTGC TTTGGAGACT
    13441 GGTCTTCATG GCGATCGGTG GGGAGGAATA GGGTGTCGTA GGTAGTTCTG GCATCAGAAG
    13501 AGACAGAGGT GTTGGTGCTA GAACCAGATG CAGAGCCAGA GTTGGAGCCA GAGTCAGAGC
    13561 CAGAGTCAGA GTCAGTGTTC ATTTCAGTAT CCGAATCATC ATCAGCGACA AGGGAGTCAA
    13621 GCTGAAGCCT GTCTTTGATA GCACGGACAA AGGCAGCCAT CCAGCTAGTC ACGGCCTGAG
    13681 TCTTGGTAGG GACAGCTTGT TGTTGACCAT GAAGGTTGAG AAGGTCGGTG TTGTTGGTGA
    13741 CGCTGAAGAG GAGCATCAAG ACGGTGGCAA GAGTGATGTC AGCACCAAAG CTGGACTTGA
    13801 TCACTTTGGC AAAGTCTGCA AAAAGGATGC CTGGGAAGGG ATCCTCCAGT GGTGCTGCAG
    13861 AGACACATGG AAGGAGTCCA AGGAGCAGCC AGAAAGAGAG CAGCATGAGC AGGGCCTGTA
    13921 AAGAAAAACT GCTGAAGTCA GTACAAGTTG AAATGCAAGG TGAGATTCAA ACAAGAAATG
    13981 GCAACACGAA ATCATTTGAA TTACATCTAT GATTCACAAA CAGACTACCT ACTTCGAAGT
    14041 TGAGGCCTTC TTGGACTTCT TTTCCTTGGC CAGCCTGGCC TTCTCCTTGG CCCTCTTCTC
    14101 CTTGTCCTCC TTGTCCTTCA ACTCCTTCGT GACAGCTGCC AAGTTCTCCT TTGTAAGCTT
    14161 GTGAGTTCCC CAGACAGCTC TGTGTTCCTC TGAGCTCTGA TCGTAAGTGG GGTCGTTCAA
    14221 CAGAGCATGG AGGATGGGGA ACTGCTCAGC GTTGTCGAAC ATCTTGGAGT AGGTGTTGTA
    14281 GTTGGTCTTG CGGATGTAGA GTGAGCGAAG TTCGTCGATG GAAAGATCAC GACCAGTCCA
    14341 CTTCCCTGCA TTCTTCAGTT CCAACCACTT CGCTGGGACT TGGGCAGCTG CCTTCATCCG
    14401 AGCATAGATC TGCAGGATCT CACCCTTCTG AGATGCCTTG GGCGTCATGC TGTAGGGGAG
    14461 AACATGACAC TGACCCACAG GTTAAGGATG GACTCCAGTT GGAGTCCAGT CAGAGTTCTG
    14521 GACTCAGATG AGAGTCAAGT CAGAGTCAGG TCAGAGTCAG GTCAGAGTTG ACATGTTTCA
    14581 CAGGCCAAAA CCATCTGGAG TGGAATGGAC TCTATATAGA CTCTACCTGG AGTTTCAGAG
    14641 TTGATCCAGA CTCAGACTGC ACTCAAGTTG GACTCCATCC AAATCCAGGT TCACTCTGAT
    14701 AGGTTTAAGC TACCAGAGTT ACTCAGAGTG GAGCTGGAGT GGAGCTGGAG TCTAACCATA
    14761 GTCTAGTGAG AGCCAGGTCA GAGTTCAGCC ATATAAAATG TGGCAATCTT GGCAAGTTGG
    14821 GCTAAGAGTC TGAGTTGAAT TTATACTGAT TTTGATTCTC ATATTACTCG GCAATGGAGC
    14881 CTTCTAATAT CAAATCAATC ACAGATATTG TTATTTTTTT TTTCTATAGA GTAAGTTAGA
    14941 GGTCATTACA CAACTGTGAC TCTCTTCTGA AGCATGTGTA CATTAGTAGA TTCCTATTGT
    15001 TCAAATCACA AGTTCAATTG CATTTGTAAT GACTCTTATC TGAGTCTATC TGAGTCTCAG
    15061 TGTTCTTTGG AATAGGTGCA TAATATTATC AGATTATAAG ATTGAGTTTA TATAACTTAC
    15121 TCCCACTAAT CCAATCTGCG TCTATTTAGT GTACTACTCT GAGTAGCATT TAAATTGTTT
    15181 AATAATTTAC CAGAACTTCA AATCACCACT TCATACATGA CTTATTGAAC TATTTGATTG
    15241 TGAATTAACA CACAGAGTCA TTCAGGACAA GTGTAATTTA TCTGAATTCT TGATAGAGTT
    15301 TTGGGTTCAA TCTAGATAGA GTCTAAACTG ACTCTGGATG AGTGGAGTCC AACCGTAGTC
    15361 TGAGTGGACT CTCACTCAAC TCAGATAGAC TCCGCTCGGA GTGTAGTCAG AGTCCCAGAG
    15421 TCCAGTCAGA GTCCAGTCAG ACTCATACAG ACTCTATTAG ACTCTACTCA GACTCTCAGA
    15481 GTTCAGTCAG AGTTGAGTCA GACTCAACCT AGACTCAGCT CAGACCTGTG GGTCAGTGTC
    15541 ATGTACACCT GTAGGGCACC TTCAGCATGA TGGCAAGCTG AAGAAGGGCG GGGTCGGAGA
    15601 AGGCGGTGGT GAGCTGCTGG GAAATGGTAA GCGAGGCGGT GTTGGCACCA GCAGTGGAGA
    15661 CGGAGGCAGA GGGGGCAAGA GATGAGATGG TGGAGGGAGC GTCGACAGAG GTGACAGAGG
    15721 GGGAAGGAGG GGGGTGGAAG CCAGAGCCTT GGGTTGAGCG TTCCTGAGTG AGATAGAGTC
    15781 AGAATTTTTT TCAAGTCAAG TCGGAATTTG CTTACCATTA ACAACTCCAT TTCCTTGTTG
    15841 TTGTCCCACT CAACAGGCTC ATCCCCCTCA ATAGCCACAG CAAATGGGCC CTTCATCTCC
    15901 CAGTCATCAT TGACCCACAA CGAGATGTCA GAGTCTAAAT GGCAACAAAT AGTAAGCAAA
    15961 AAACGCGAAG TCAAAATGTG TGACATACCT GCAAGAGCGG TCATTTTCTT GACCATAGCC
    16021 TTAAGGACAG GCCCCAAGGT GTAAGCCAAA GGGATCCTTA CAGCACAGGG CTTAGCAATG
    16081 GTGCGGTCCT CATGCTTGTA CACCAAGACC CTGCCCTCAT TGCGAATGGG GACAAGGTCT
    16141 GCTTGCTGGG TATCTAAGAA AGAAGTCAGT AAGTGAGCCA AGTATGAAAA GCACAAACTC
    16201 ACTGAAGTCA GCCATGTTGG GGGCTACCCC ATGTCCTTTG GCCCTTGCAA CTCCACCCAT
    16261 GGTACGGGAG GCGCCTTGCA AATCATTGAA GTCGTCAGCG ATGGGAGAGG AAGGCATATC
    16321 GTTGAACCCA GCAAAGACAG GAGCAGGCAA AGGTGTATTG TTGGCATGGT CAGCCTTGCT
    16381 GCGCTGAGCT ACATGGCGAT GGGCGATGGG AGAGGCGCTA GCCTGACGCT TGGAGGCAGG
    16441 CAGGTTGCGA GGGGTGATGT TGGAGTCGAG GTCCATGGCA TCGTCACCTG TGTCAGAACT
    16501 CTTGTCGTCA CCTGCATTGG ACACCTCATC ACTCAACATC TTTTCCTTCT CCTCCTCGCT
    16561 CGATGTCTTC TCCTTCTCTT CATCGTCATC CACATCTCCT GGCCCTTCAT CACTCGACTT
    16621 CTTTTCCTCC TCCTGATCCT CCTCTTCTTC GTCATTATCC TCTGGCTCGT CCTCTGCGTC
    16681 AGATGAGCCG AGATTGGTCA AGTCGCGACC TTTCCCCTTG TCTACGACTT GGGGAACATC
    16741 ACCCGGATCA GCACGGCGAA CACGGGTGGA GACAATCCTC GGAGCGACTG GGGGTAGGAG
    16801 AACCCCAGTC CCAGCTCGGC GAGGTGGCGG AGCAAGAGCA GCCCCACTCT CACTGAGAAT
    16861 TCTAGATGTA CTGGTGCGGA CAGTCAGTTT GTGGACACAA GCAAGAGCAA GTAAAAACAT
    16921 ACACAGTCAT CTTCTGCACG GTAGGTTCCT CAGCCTCTTC ATCTTCTTCA TCACGGTCGG
    16981 CGGAGGTCCT ACAAACAACC AGCATGAAGA GCGGATGAGT AAATAGACAA CGGAGGACTT
    17041 ACTTGGTTTT CTTGTTGGTC TTGGGAGTCT TCTTGACTTG TTTAACTTGC ACAGGGAGGT
    17101 CCTCACTATC AGACAAGGTG TTGTCAATTC ACTGTCAATT TATTTGAATT TAAAAGGAAT
    17161 TTATTTATAT TTATTACTAA ACTATGTACT ACTACTAACT ACTAATGAGA ACGAGGGGGG
    17221 GCTGACTCAC CTGAGGGCCT CTTGAAGGGC CTTGGTTGCT GACCTAGTTG ACCTGGGCTT
    17281 GTTGGGAGTG CTGGTGGTGG CACAGGAGGT GACAGTAGGC GTTGGGGGAA TGGCGGGGGC
    17341 CATTGGAGGG TGATGGGGGG CGGGCGTCAT TGTCGACAGC AATGGGGGGA CGACGGGGGG
    17401 CAACGGGGGC CATTGGGGGC GTCGACGGTG ATGGGGGGAC AACGGGGGAT GTCGATGGCG
    17461 TTGGGGGGCA TAGGGAGGCA TAGGGGGGCA TAGGGGGGCG TCGACGGCGT TGGTGGGACG
    17521 ACGGGGGGCA ACGCGGGCCG TTGGGGGGCG TCAACAGCGA TGGGGGCATA GGGGGCATAG
    17581 GGGGGCATAG GGGGGCGTCG ACGACGTTGG TGGGACGACG GGGGGTGCAC GTCGTTGTCG
    17641 ACGGCGATGG GGGGCATTGG GAGCGTGTTG AGGGGCGGGC GTCGTCGTCG ACAGCGTTGG
    17701 GGGACGACAG GGGGCAACGG GGGCCGTTGG GGGGGCGTCA ACGGCGATGG GGGCGTTGGG
    17761 GGACGTTGGG GGCCGCGCGG CGTCGTCGAC GGCGAAGGGG GGACGACGGG GGGTGCGCGT
    17821 CGTCGTCGTC GACGTTGGGG GGCGTTGGGG ACGACGGGGG GCGTCAACGG CGAAGGGGGG
    17881 ACGACGGGGG GTGTCGACGG TGTTGGGGGA CGACAGGGGG TGTCGACGGT GTTGGGGGAC
    17941 GATGGGGGGC GTCGACGGCG TTGGGGGACG ACGGGGGGTG TCGACGGCGT TGGGGGACGG
    18001 CGGGGGGTGC GCGTTGTCAT CGTCGACGTT GGGGGGCGTT GGGGACGACG GGGGGCGTCG
    18061 ACGGCGAAGG GGGGACGGCG GGGGATGTTG ATGGCGTTGG GGGGGGCATA GGGGGGCGTT
    18121 GGTGGACGTT GGAGAGTGGG GGGAGAGGCG GGGTGGTGGT CAGTTGTATA AAAAGGAGGG
    18181 GGGCGGGCGG CTTACCTTGG CCTGCCCTCC TCGTTGTTCC TGGCGGCTCC TCCGCGTCCT
    18241 CGCGACGTTG GCTTGCGTGG GGGCATTGCG ACGTTGGGGG GGGGTTTGGT GAAAGCGAGG
    18301 GGATGGGGGA TGGTGGTGGT TGAGGGGAGA GAGGCGGCAG TGCCAGCGTG GCACGCCACT
    18361 GTCACATGCG CGTGGCGTCG CGGCGATTGC CGGATAGGCG CGCGCCTAAA TAAAAAAAGA
    18421 AAAGTAAAAT AAAATAAAAA GAATATTAAT ATTCGTGGTA AAGCGCCCAA TAAGCGCCCG
    18481 CCCGGAAAAA AAAGAGTTAT CATCGGATAA CCCTTGCTAA CTCATTTTTG GACGTCCCAA
    18541 AGCGGAAATT GCCTCAGAAA AACACCAATA AATTGTAGAA AATTCAAATA AATTCACAGA
    18601 AATTGTCTAA AAATTGTAAA AAATATATAT GTATATACAA TTGCATTATT ATCAATTGGT
    18661 GTTCAAGTGA CATTCACTTG GTGTTCAATT GGTGACCACT TGGCATTCTA CTGAATTTTC
    18721 AGTTGGACAC CAAATGAACA CTAATTATTC ACTTAGTTCA CTTGGTGTTC AACTGGTGTC
    18781 CAACTGAACT GAACTGAACT GAACTGGTGT TCAACTGAAC TTTCGTAGCC ATTTCCCAGC
    18841 CAAATAAAAA ATGTCAAAAA TTCAGTTGAA CACCAACTGA ACACCAATTG GACACCAGTT
    18901 GCCAACTGGA TCCAGTTGGT ATCCAACTGA AGACGTGGTG AACTGTCAGG TGCTCCAAGG
    18961 ATGTTGCTGA TGTCATTCCA AGGCAACCCA ATGACCCTGC TGCAGTTGTT GGCCATGATG
    19021 AAAATCATGC TGTTCCAGAC TATGCAGGGG AACCTGTTGA TCCAGATGCA ATGGAGGTTG
    19081 ACAACCAGCC TGCTGCTGTG GTTCAGCCTA CTGGCCCTGT TGCACCTGGC AATCATGGAG
    19141 AGGTCCGCAT GATTGTCATT GATGGAATTG TCATGGGGCC ACGACATTGC GCAATGGAAG
    19201 GGTGTGAGGC AGGACTTGAG AATGCCCAAA CTGGGGTGTT CTGCAAGAGG CATGCAGAGA
    19261 GGATGGAAAA CAAGTGCCAT ATGAAGGGAT GTGGCAAGGT CAAGGTTGGT GACACGAAGG
    19321 CCTGTCAAGA TCACCAGGGG CAGTGGGCCA CATTTCGCAG GCAATATGCC AACACCTCAC
    19381 TTCTTGGAGT GCAGCGGATG TTGAGAAGAG CTCAGGAGGA GAGACAGGAA TGGTTGCCTG
    19441 TTGGTGGAGG AGCAGAGGCG CCAGAGCATG ATGACCTTGC AGAGCAGGAG GTTGAACAGG
    19501 TCAGTGGCAG CAAGTATAAC AACTACTTCT CTGCTCCTAG GTACTACTGT GTGGAGACCA
    19561 TCTGTGCTCC ATGTGGTGTG GTCCTTGCCT GGCGCAAGTT TGCCAAGTCG GAAGGGGTGG
    19621 CCAAGATTCT TCGGTTCCTT GAAGATGTCT ATCCTGATCC TGCCTCACGC CCCAGCTACA
    19681 TTGCCATTGA CAAGGGGTGC GCCTTACTCA AGCATATTGT CAGGCAAGGT CACTGGCCTG
    19741 CTTGGGAGCC AACAACTAGG ATTATTGTGG ACTCATACCA CTACATCAAC CACCGGATCA
    19801 CTGATCATCT TTGCCGGACC TGGTGCAATC CAGCACCCCT CAATGGAGAT GCACCAAATC
    19861 TTGTAGTGGT TGCCAATGAC AAGCAAGGCA ACCCTTACTA TAAGAGGGCT TTCAACACTC
    19921 AGGTAAGTGA ATTTAGTGGT CTAGCAGTCA TACTTGTCTA ATTTGAGCTT AGGCCTGTGA
    19981 ACAGCTCAAT GCATGGATTG GAGGTTTCCA GACTGTTCTC AACCGAATGA CAGTTAGCAA
    20041 CTTTGACTTC ACGATGCATG TGCTGTTATT CATACACACT CAATGGGTCA TTGCCAAGCA
    20101 GGAGGAAAAG AAGAGGAATC AAGAAGCAGG GATAGAAATG ACAGACAGTG ATGAGGAGAG
    20161 TGAGGATGAA GAAGACTCAG AGAGTGAAGA GGAGAGTGAA GAGGAGGAGG AGAGTGAGGA
    20221 GGAGGAGGAC TAAATGTGTC AAAGTATTTA CCTCTACTAT GTATAAGTTG CATATGAAGT
    20281 GCGCATGAAG CGCACATAAA CCACATATAA AGTTCACATG AAGCGTACAT GTATGTTATA
    20341 TAAACTGCAC ATAAAGCATA TATATATGCT GTATAAACCA CACATGATGC TCATATAAAG
    20401 TATACATTCG CTCTACACAA ACCACACATG ATGCTCATAT GAAGTTTACA TTTACTCTAT
    20461 ATAAAGTGCA TGTAGTGCAT ATATAAATCA CATGTAAAGC TCATATAAAG TACACATGAA
    20521 GCTCATATAA ACCACACATG AAGCTTGTAT GCACTTGTGT ATGAGACAAA CTCATAACTT
    20581 AGTTGTAATC CATATGAATA TAAACTCTTC ATATGTGCTT CACATGGACT TCACATGAAG
    20641 CACATATGAA TGTCGCATAT AAACTTCACA TGCAGTTCAT ATAAGCTTTA CGTGAAGCTC
    20701 CTCAACAATT GTTATTGCCT CAAAGTCATG AAGAAGTAAA GAAAATGTAG AAGAAATGTA
    20761 GAAGAAATGT AAAGCCTGAA GGAATGTAAA GTTTCGCAAA AGAAGTGGGC TTTATATGAC
    20821 CTTTATATGA AATAAATGTA CGGAAGATGT GAAGTCATGT GCTTCATATG AGCTTCATGT
    20881 ATAAATGTGG TAAAGCGCCA GATATACAGA TTTTGGATAT TAGCCATTGC CTTGCTAATC
    20941 CTGACTCCCA AATCGATTAG ACCTTCATTG TCCTCGTTGT GGATTGAGAA CAGGTCATCA
    21001 TATGCATTGA AGTGTGCGCC GGGCTTCTTG GATAGGTGTG CCTTCTCTAT GGCAGCCCAC
    21061 ATTCCCACTG GATCATCCTC TAGACCTCGG AAATGAATCC TTTGGTCCGC CTCAACCAAC
    21121 AGGTAAATCT CCCCAGCAGC CTTTTCAGCT TTTGCCTCCC ATTTGGTCAG CTCAGCCTTG
    21181 TCTCACTGCG GGCATAAGCC CATAACCTCA TTGAGGGAAT CCAGAAATTA GTATATGAAT
    21241 TAACGTAAAT ATATTCTCAC TTATGTCACA AAGGGTACTT AGATATAAAT GTAAATAACA
    21301 ATTCAAAATA AATCCTCATT TACTCCATGG TGGGTAATCA GAATACAACC TGAGTTGGCA
    21361 GGCCGGAGTT ATTGAGATTT ATAATCTAAA TACCTTTTGG TTATCTTCTA ATTAATATTG
    21421 ACAATGGAAA TTAGAATAAC TTCTCATTTC CACGTGGGAT GATTGGCTGA ATATAATCAC
    21481 ATTGCCATCA TGCTAACCTC ACTGAGGATA TCTTGATGTT ATTTTGATTT TACTTTATCT
    21541 TATCTTCAGG TTTCCCTCCG CGATGGTATT TTGATTATCG TCGATGTATA TATTGGGAAT
    21601 CTTGTTATCT ACAAGTCGCG TGTCTTCTAA TTAAGATCAA ACTCATGTGA CTTGACATTC
    21661 GGCATTTGCC GGGTCACTTT CCGCATGACT CAAGCCTGTG TCTCCATTGG GAAACTTTTC
    21721 CTCTTTCTTT CGTACCACCA TGTAGATGTA GATACATGTT GCAATAGTAT AAGTAGCACT
    21781 CACTAGACAC ATCAACATTA GTATAATTAG TACTAGATAC ATCAACATAA ATTCAACTGG
    21841 TAATAAGATT GCCCTAAATC AGAAACTACA GAAAAACATG AATACAAGTA ACTTAATTAG
    21901 TAGTAATAAT ATTCCAAACT ATGTAGTCAG GAAGCCCAAG CAACAAGTTT GATTTCAGTA
    21961 CTCCCCTTTC CTTCATCCCA TGGACTCTTA CCTACATTCC CTTCATTCCC CTTCATTCCT
    22021 TTTCGCTCCC TTTCCTTTCC ACTTCCTTTC CACCCACTCC TTTCGCATCC GAGCCGCGTC
    22081 CGGTGACTCC GGAGTCTTCC CGCACTTCGG ACACTTCAGA CTCGCTCGGA CTCGTTTCGG
    22141 ACACTTTGGA CTCGCTCGGA CTTGTCTATA CTCTTCGGGG CTCGTCCGGG TTACCTCTAT
    22201 CCTTTTCCCC CACTTCATTA CTCTTCGCCC TTACTTCCCC AAGTCGCTGT CACGACTCCT
    22261 GTGCATTTAC CCTCCACTTC ATTATCACAT GTTTCCTTGT ACCTTGTGAT ATTCGCTCGG
    22321 ACTTGTGGCT GGTGTACTGT ACAGTTACCC TTCATTCCTC CCACGCTACT ACAGTATATA
    22381 CTTCGCTTCC TAGCATGGAG AATCCTTATC CTGTTCTCTT TGGATTCTCC CTCTGCTAGG
    22441 TGAGCAGCCC TCTCATGTAT TGTAGTTAGT CTTATTCATT ATCTTTGGAT TCTCCCTCTG
    22501 CTAGGCTCGC GCTGTGCGGC CATCTTGAGG TTGCACTTAC AGAGGAGGTC ATGTCTCTTC
    22561 ATTATTTGTT ATATCTAGTC ATCGCAGATA CAAACGAGGA CACACAACAC TCATATCTTT
    22621 GTCGATACAC TATACTAACA ATCCTCTTCT ACTTCCCTCG TTTGATCACT GTAGGGTTGG
    22681 CATCCTGTTC AAGCCCGGAT ACACAATTTA TTGTACGTAT ATTACCATTT CGTTTACTTC
    22741 CTCGTTCGGT CCGAGCACTC GAACATGAGC TGCTGCGGCA CATTGTGTTT TAGGTATTAT
    22801 TGTTAAACTT TAGGCTATTA TTCTTTGATC AGAAGCTTGT AGAAGTGTTC TAATACACTC
    22861 TAATTGCCTT GGTAACAATC ACTAATGATG TTGATGCAAT CAATCAATAA TATGTAATGA
    22921 TTTGCACTCT ATTGACTCTT TGTGTCTATT ACTGTAGACA TGTATGGAAA ATGACCATCC
    22981 CAGGTTCCCA CGGGTACTGT TCTGCGCGAG GCGTGAATAT AGGTGTCCAC TAAATCGCGT
    23041 CCGAATTTGA TTAGCTCCGG AGCAGCTTGG GAACATGCCA GACATCATTC TAATGATGGC
    23101 TCCATGTTTC ATTTTCGCTC CTTTTGCTTC CCTGCTGAGA CCGAGGTGTT CCAGTGCCTG
    23161 TTCCGGCCGT CACAATAGAG GTCAACAGAC CTACTAATGG GGCGCTGAAC GTGGGAACGT
    23221 TGCATTGACC GTGGGAGTCG TGCGCTTGTA ATGTATGTAC AGATTGCTAA ACAGTGCTTG
    23281 CGCACTTTTA GCAATCCTGT CAACACCAGT CATCCCATGA TGACCTGGGT CGTCCCAATG
    23341 GGTGTTGGCA GTGTCTATGG GTGTTCCCCA ATGCGTGGGA ACCGGGCGCT TATGTAGCGC
    23401 AACTTTGTTA TACATTTGTA CAACAAGTGT GCACATCACT TCAACAATTA TCTTACTTGT
    23461 CCATGCATAT TCTGCGTGCC TCCTTACATA TACTACAAGT ATATATAGTA CTTAGATATC
    23521 TACCTACAAC AAGAAGAAGT TAGTTTCCCC TTCCCTCCGC TGCGTTGTGT TTGAGTCAAG
    23581 TCCAGCAGTC GCACACGGCG CTGCTTGGTC GTGTCCCGTT TCTCTGTTCC ATTCGTCACG
    23641 TGGCATTCAG ATTTGTTCCA TCTCACTTCG CTTTTGGTGG GAACACCACC CATTCCCAGT
    23701 CCTCCCATTT ATTTACACCA GCGAATACGA CTCGCACCTA CAATTTTGGA GCCCACCGCG
    23761 AGGGACACAA AAGCTGAAGC TTCTCATCCT TTTTCATTAG GTCATCTTTA GTTCATTTTG
    23821 CGTCACGACT CACGACTCTG CGACACGTGC CACGACTCCA GCCAGCCGCT CAGATTACCC
    23881 AAGGACCCGT CACGACCACG TACAAGCAGC GCACCGTCAT TATCACTCAG ATCTCAGTAC
    23941 CCCACGTGAA GATTTCCTCT TGCCCAGCCT CGATCAGCTC GTTATCCCTG GAATTACCCC
    24001 AGCACTCCGA TCGATCACAC TTCCAGCCAG CGTCACGACC AGCATCTATG TTCTCGCACC
    24061 TACACGCCCC ATGGATCCAG CATGCCTCAC GTCAATATGC CAGACGTATA TCTGGCAGTT
    24121 CACCACGTCT ACAAGTGAAC ACCAACTGAA TCCAGTTGGT CTGGTCCGAC CAGTTGGACA
    24181 CCAACTCAAG TCAACTGAAC TACCAACTGA ACACCAATTC GACCAAGTAA GTGTTGAAGT
    24241 GATGTGCACA CTTGTTGTAC AAATGTATAA CAAAGTTGCG CTACATAAGC GCCCGGTTCC
    24301 CACGCATTGG GGACCACCCA TAGACACTGC CAACACCCAT TGGGACGACC CAGGTCATCA
    24361 TGGGATGACT GGTGTTGACA GTATTGCTAA AAGTGCTCAA GCACTGTTTA GCAATCTGTA
    24421 CATACATTAC AAGCGCACGA CTCCCACGGT CAATGCAACG TTCCCACGTT CAGCGCCCCA
    24481 TTAGTAGGTC TGTTGACCTC TATTGTGACG GCCGGAACAG GCACCGGAAC GCCTTGGTCT
    24541 CAGCAGGGAA GCAAAAGGAG CGAAAATGAA ACATGGAGCC ATCATTAGAA TGATGTCTGG
    24601 CATGTTCCCA AGCTGCTCCG GAGCTAATCA AATTTGGACG CAATTTAGTG GACACCTATA
    24661 TTCACGCCTC GCGCAGAACA GTACCCGTGG AAACTTTGGA TGGACATTTT CCATACATGT
    24721 CTACAGTAAT AGACACAAAG AGTCAATAGA GCGCAAATCA TTACATATTA TTGATTGATT
    24781 GCATCAACAC ATCATTAGTG ATTGTTACCA AGGCAATTAG AGTGCATTAG GACGCTTCTA
    24841 CAAGCTTCTG ATCAAACTAT AATAGCCTAT AGTTTAACAG GTTATGGGCC CTGAGCTCTA
    24901 ACTTGACAAC ACTGATTGAT TGTTCCTGCA TTATTGAATT GCTGCCTATT GTTATACTGG
    24961 GGGTTTATTG TGATTGATCT AGTGACTCAT TGAGTACTGA TCTCGCATTT TGGCCTATTG
    25021 GAGCTATTGA AAGTCACAAC AAAACTATAA CATTGTTATT GATAGTCACT ACAGGACTCT
    25081 AAGCTGTTAT TGATAGTCAT CACAGGACTC TAAGCTGTCA TTCATAGTCA TCACAGGACT
    25141 CTAAGCTGTT AATTGTCAGT CAAACAAGAC TATAAATTGT ATTGTTGCAC TATGTCTACT
    25201 AGTTCTAGCT CAGATAATGG GGTCAAGGTG AAGCCACTGA CCAACTCCAA CTATCAGGAG
    25261 TGGTGTGGTG AAGCCAAGGC CTATCTGATG CGACTGGGGC TGTGGAGACT AGTGTCTGGG
    25321 AGGGAATCTA AACCTTCAGA CAAGGCTGAG CTGACCAAAT GGGAGGCAAA AGCTGAAAAG
    25381 GCTGCTGGGG AGATTTACCT GTTGGTTGAA GCGGACCAAA GGATTCATTT CCGAGGTCTA
    25441 GAGGATGATC CAGTGGGAAT GTGGGCTGCC ATAGAGAAGG CACACCTATC CAAGAAGCCC
    25501 GGCGCACGCT TCAATGCTTA TGACGACCTG TTCTCAATCC ACAAGGAGGA CAACGAAGGT
    25561 CTCATCGATT TGGGAGTCAG GATTAGCAAG GCAATGGCTA ATATCCAAAA TCTGCGTCCA
    25621 ACAGGCTTTA CCATTGAGCA GTTAGACGAA GAGCTACAGT GCATGGCATT GATTCGGGCT
    25681 TTGCCTGATG AATACAAGCA CTTGTCAGCT TCTTTGTTGC TAATGGAAAA GCTGGACAAA
    25741 GACACCATAC TCCAAGCATT CCGAAGCGAA GAGCTTAATC GTCAGCGCCA GACTGAGCAA
    25801 GCGAATAGAG CCAGTCACAA GGGTTATGGA AAGAAGGGTG GGGCATATAA TGGAAAGGGC
    25861 AGAGGTCACC CCACAGTTGA TGCAGACACC TGCTCATTCT GCAAGGGCAA GGGTCATTGG
    25921 AAGAAGGATT GCGAAGCATT GAAGAAGGTC ATTGCTAGCA ACAAAGAAAG TGGATCTGGG
    25981 GGGAGCAATG CCAAAGTGGC AGTGGAAAAG GCAGATGCTG CGACAGAGTT TGCTGGTCAG
    26041 GCAAGTGCTC GTTCTATGAA TGAAGCTTGT GCTGCATTTT CTAATGATAC CCATTGGAAT
    26101 ACAGATACAG GGGCCACTTC TCATATGACA CCTCACAAAG AATGGATTCA CAATTATACC
    26161 ACATATAGAG TGCCAATTAG GCTACCGGAT CACACCATTG TATATAGTGA GGGCGTCGGA
    26221 AATGTGCTCT TCAGACCTGT AGTTAATGGT AGACAAGTTA GAGATGTGGA GATCACTAGA
    26281 GTACTCCATG TTCCTGCATT GTGCAATAAT CTGCTTGCTG TTTTGTATTT GACTCGAAAT
    26341 AAAGGCTTTA ATGTTCATAT CACAAAGGAT AAAATGGAGT TTGTTCATAA TGATGTTCTT
    26401 TTGTTCTGTG CTACAATCAA TAATGCTGGT ATAGGCCATT TAGATGGTAG TACAATAGAC
    26461 ACAAATGAAT TTGTTCATGT TGCGTCCACT CTGCCTTTGG ATCTGACTCT ATGGCATAGA
    26521 CGGCTTGGCC ACCAACACCA TGACGGAATT AAGCAGATGA TTAAAGATGA AATGGTGGTT
    26581 GGATTGACAC TGGACTCTTC TGCAAAGCCA GATCCTGTTT GTATTCCCTG CATGACTGGG
    26641 AAGATGCATG CAAATCCATT TCCTTCGTCA GCCAACAGAG CTGATGAGCT GTTGGCATTG
    26701 GTACACTCTG ATGTTCACTA TGTTGGCATT GATTCACACT CTGGTCAGAA ATATTGGGTC
    26761 ACATTCATTG ATGACTACTC CAAGCTGAAG GTGGTGGTTC CCCTGAAGCT GAAGAGCGAA
    26821 GTCTTTGCTG CATTTAAGCG GTTCAAAGCA TGGGCTGAGA ATCAGACTGG CAAACATATC
    26881 AAAGTCTTCA GATGCGACCA GGGTGGTGAA TTCATGAGCA AGGAGTTTGA CAAGTATTTG
    26941 GAGGAGCATG GAATAGAAAG GCAGTTCTCA GTGCGAAACA GACCACAGCA GAATGGAGTG
    27001 GCTGAGCGTG CAAACAGACT GCTTAGTGAA CGGATCACTG CAATGCTGGA TGAGGCTGGA
    27061 TTGTCCAAGG CCTTTTGGGC TGAGTGTTTG GCTGCACTTG TTCATGTCTT GAACCGATGC
    27121 ATTACATCTT CAGTAGCTCA TGCTACGCCA TATGAGGTGT GGCATAGACG AAAACCTGAT
    27181 GTTGGGCATT TGCGGGTATG GGGATGTGTT GCTTATGTGC ATGTCCAGAA GGACAAGAGG
    27241 GAGCATTTGG GTTCGCATAT GGAGAAGTGC ATATTCATTG GGTATCCTGA TGGGTACAAG
    27301 GGTTGGAAAT TCTACAATCC AAAGACGAAG AAGGTCATCA TCTGTGAACA CGCAGACTTT
    27361 GATGAGCGCT ACACCTACAG TGGCCAACTT CTGAAGGGCA TTGATGAGCA CGACCTCTCA
    27421 GAACCAGCTC CTCCGAAAAC CAGTCAGCAG AGCGCACCAG AGGCACCATC CAAGGACAAA
    27481 GACAATGCTC AGCAAAGGGT GATCGACTTG CCTGCAGTTG ATAATGATGA TGAGGACAAT
    27541 AGCAGTGAGG ATGACACTGA TGACAATGTG AAAGAAGAAG AACAGGTGGA GGGTGAAGCG
    27601 CAACAGGAGA ATCATGAGAC ACCAGAGCCA GAGGAGACTC CCCCACCTCG TCCTCGTCGC
    27661 AGAAGAGCTG CACCTCGTGT GGATGACAGT GATGATGAAG CTGAAGTCGA TGATAGACCT
    27721 GTGGCTGTAA GAAGACCAAA ACGCGACATC AGACCCCCAG GAGAATGGTG GAAGGTTCCT
    27781 GCTGCACCTC CAAAGGCCAG GGAGGCAACT CCGGACGTCT GGGAAATGCG AGATCCAACT
    27841 CCTGCTTTAG ATGATGATGA TTCTCAGTCT GAAGAAGAAG CTTTGGAGGC TGGTCCTGTT
    27901 GGCAAGCTAG TCGAGCCAGA GACATATGCT CAGGCAATGA GGTCGCCCCA TGCTGCACAA
    27961 TGGCATGAGG CTGCACTAGC TGAATACAAC ATGCTGCTTG CTAATGGGAC TTGGACACTG
    28021 GAACCTTTGC CAGAAGGAAA AGTGGCAATT GGAGTCAGAT GGGTCTTTCG GGTCAAATAT
    28081 CATGCAGACG GAAGCATTGA ACGGTTCAAG GGTCGGATTG TTGCTAAAGG ATTTAGTCAA
    28141 CGGCCCGGAT TTGACTATAA TGAGACCTTT GCTTCGCCAT CAAGACACGC TACCATCAGG
    28201 ACTGTGCTCG CTCTAGCTGC TAGAGATGAT CTGCACTTGC GCTCAGTTGA CATTTCGCAG
    28261 GCATTCATAA ACAGTGATAT TGATGCTGAG GTGTATATGG AGCAGCCTGA GGGATTCAAG
    28321 CAAGGTGTAA CCAAGGGTCA AGGAAGGATA GTCTGCAAAT TGAACAAGTC TCTGTATGGA
    28381 TTAAAGCAGT CACCTCGGTT GTGGAGTGAG AAGCTGGGAG AAGCATTACA TTCAATGGGC
    28441 TTCAAGAAGA TTTACTCTGA CCCCTCGCTC TACATCTATG ATGATGGCAC TGTCAGAATC
    28501 ATAGTCCCAG TGTGGGTGGA TGATATCACT CTTGCTTCGA AATCAAAGGA GGCTCTTGAC
    28561 AAGTTTGTGA TTGAGCTGGA AAAGCATTTC AAGTTGCGGG ACTTGGGGGA GACTTCGTAT
    28621 CTGCTGGGCA TGGAAATAAC ACGAGACTGG GACAACCACA AGCTCTACAT CTCGCAGCGT
    28681 CAGTACATTG TCAACAAGCT AGCGCAGTTC AATATGTCTG ATTGCAAACC AGTGGGGACT
    28741 CCCATGGCTC CGGGTATGAA GTTGACCACA GATGACTGTC CCAAAACGTA TGAAGAAGCA
    28801 CAAGAGATGG TGGATATCCC CTACATGAGT GCTGTTGGCT CCTTATTGTA CTTGGCTACA
    28861 ATGTCCCGGC CTGATATAGC CTTTGCTGCG AGCGCACTGG CTAGGTTCAA CTCGAACCCA
    28921 GGCATGATCC ACTGGAAGGC TGTAAAGCAC TTGCTGCGCT ATGTGAAGGG CACGATGGAT
    28981 ATGAAGTTGG TTTATGGACC AGATCCCGCC GTAGGAGATG AAATCTTCGT CACGTACAGT
    29041 GATGCAGACT ACGGCGGTGA TAAAGGGACA GGGCGGTCTA CAAGTGGTTA CTTGGTTAAG
    29101 ATTGGGCTGG GAGCAGTCTG CTGGAGCAGT AAAGCGCAAC AGATGGTTGT TCTATCAACC
    29161 ACTGAAGCAG AGTATGTTGC TGGGGTTGCT GCTGGTAAAG AAATATGCTG GATGAAGAAC
    29221 CTTCTCTCGG AAATTGGTTA CAAGCCAACT GCACCATCCA CGCTCTACAT GGACAACCAG
    29281 TCAGCGATTA GAGTGGCAAA GAACCCCGAA CACCATGGCA GAATGAAGCA ACTGGACTTG
    29341 AGCTTCTTTT GGTTACGCGA TCAGGTTGAT TGCAAGCGCA TCCAGCCAGT CTATCTTCAA
    29401 ACAGAGGAAA TGCCGGCAGA CCTGCTCACC AAAGCACTGG CCAAACCACA AGTGGAAAAG
    29461 CTGAGGGAGA TGATGGGATT GGTGGGATAG GAGGACGTAT TGGGCCAGGG GGTTGTTTGT
    29521 GGGTGCCCCA ATACGTGGGT CCACCAAGTG TTGCATCAGG GGGTTGTGTT GAAGTGATGT
    29581 GCACACTTGT TGTACAAATG TATAACAAAG TTGCGCTATA CCAAGCGCCC GGTTCCCACG
    29641 CATTGGGGAC CACCCATAGA CACTGCCAAC ACCCATTGGG ACAACCCAGG TCATCATGGG
    29701 ATGACTGGTG TTGACAGTAT TGCTAAAAGT GCGCAAGCAC TGTTTAGCAA ACTGTACATA
    29761 CTTTACAAGC GCACGACTCC CACGGTCAAT GCAACGTTCC CACGTTCAGC GCCCCATTAG
    29821 TAGGTCTGTT GACCTCTATT GTGACGGCCG GAACAGGCAC CAGAACGCCT CGGTCTCCGC
    29881 AGGGAAGCAA AAGGAGCGAA AATGAAACAT GGAGCCATCA TTAGAATGAT GTCTGGCATG
    29941 TTCCCAAGCT GCTCCGGAGC TAATCAAATT CGGACGCGAT TTAGTGGACA CCTATATTCA
    30001 CGCCTCGCGC AGAACAGTAC CCGTGGGAAC CTGGGATGGT CATTTTCCAT ACATGTCTAG
    30061 AGCAATAGAC ACAAAGAGTC AATAGAGCGC AAATCATTAC ATATTATTGA TTGATTGCAT
    30121 CAACATCATT AGTGATTGTT ACCAAGGCAA TTAGAGTGCA TTAGGACGCT TCTACAAGCT
    30181 TCTAATCAGA CTATAATAGC CTAAAGTTTA ACACCATGTG GTGTCCAAGT GGAGACCATG
    30241 TGGTATAAAA GTGACTAGAG TACTACACAT ACCCTTACAG CCATAGAGTA GAAGCTCAGC
    30301 TGGTACCAGG TGGTGACCAG GCGGTGTATA TGTGGTATTA ATGTGACTCG CAGATTTCTC
    30361 AAAAAATATA CAAGTCCAAA CTGATACTCA GGTGACTACC ATGTGGCATT CGTGGATGTT
    30421 TTGTGGTAGT CACCTGGGTA CCACCTGAAC ATCATGTAGG ACTTATGTGG TAATGCAGTA
    30481 GATGTCCTAG TAAAAGCAGT GAAATCCATC AAGTGTTCAG GTGGTTTTCA TATGGTCACC
    30541 ACCTGGTGTT CAAGTGATGA AAATGTGATA TTCAGATGGT TGCCAGGTGA TATGCGGGCA
    30601 TTGTGTGGTC ATCCCTTGAA TACCATCTGA ATACCATGTG ATACTCAAGT GGTAACAGAG
    30661 TGATGTGTTG GCAAAAATAT ACACAAGTCT ACACAGATAG TTAGCCTTTT TTCCTGCTCA
    30721 TGTGTCATAT TTGTGGCATT CATGTGATGT ACATGTGGAT ATCAGGTGGG TGCCAGGAGG
    30781 TAACCAAATG GGCTCCAAGT GATATATATG TGGTATTTAT CTGGATATCA AGTGGTGCCC
    30841 AGGTGGTAAA AAAGTGGTTG CTGGTATTTT ATCACTGCAC ACTTATACAT GGTGCTCAAT
    30901 GTCAGAGTCA TGTCATCAGG TAGACACCAG GTGAATGCCA CCTATACTAC AGGTGAAGTC
    30961 CATTTATCTA ATACTCAATC ATATCCTCAT CATCACTTTC CTCACTCTCA ACCACCTCTT
    31021 CTATTCCTGC TGCCTTCTTA ATGTTCCTCT CCTCCTGCCT AGCAATGACT CGCTGGGTAT
    31081 GCAAGAATAG CAACACATGC ATGGTGAAGT CAAAGTTACT GACAGTCATC CGGTTGAGGA
    31141 CTGTCTGGAA CCCACCCAGC CATGCATTGA GTTGTTCACA AGCCTAAGTA CAACAAATTA
    31201 GACAAGTACA AGTGGCTGGC TAGTAGAATC ACTTACCTGA GTGTTGAAGG CCCTCTTGTA
    31261 GTATGGGTTG CCTTGTTTGT CTTCATCAAC CACTACCAAG TTGGGGGCAT CTCCATTGAG
    31321 AGGTGCAGGA TTGCACCAAG TTCGACAGAG GTGGTCAGTG ACCCGGTGAT TGATGTAGTG
    31381 GTAAGAGTCG ACAATGATTC GAGTGGTGGG TTCCCAAGCA GGCCAGTCTT GTCTGGCAAT
    31441 GTGCTTGAGC AAGGCACACC CCTTGTCAAT GGCAATGTAG CTGGGGCGTG AGGCAGGATC
    31501 AGGATAGACA TCTTCAAGTA ACTGAAGAAT CTTGGCCACC CCTTCCGACT TGGCAAACTT
    31561 GCGCCAGGCA ATCACCACAC CACATGGAGC ACAGATGGTC TCCACACAGT AGAACCTAGG
    31621 AGCAGAGAAG TAGTTGTTAT ACTTGCTGCC ACTGACCTGT TCAACCTCCT GCTCTGCAAG
    31681 GTCGTCATGC TCTGGCAACT CTGCTCCTCC ACCAACAGGC AACCACTCCT GCCTCTCCTC
    31741 CTGAGCCCTC CTCAACATCC TCTGAACTCC CAAGAGTGAG GAGTTGGCAT AGCGTCCACG
    31801 GAAGGTCCTC CACTGCTCCT GATGATCTTC ACATGCCTGA GTGAGACCAA CCTTATTCTT
    31861 GTTGCAGTTC TTCATCCGGC AACAACCCTC CATCTCCTCC TCGTGCTCTT TGCAAAACAC
    31921 CCCAGTCTGA GCATTAAGCA GCCCAGCCTC ACACCCAGCA ATGGCACAGT GACGTGGCCC
    31981 CATGACAATG CCATCAATGA CAATCATGCG GACATCTGCA TTTGTGTGAA GTGCAACACC
    32041 TCCAGCAGGT TCAGGTGCAT CATTGGCTGG GACATTGTCA ACATCCATGG CCTCAGCATC
    32101 TGCAACAGCT GCTGCCACAG CAGGTCCTGC ATACTCAGGC ACATCACGAT TTTCATCATG
    32161 ACCAGCAAGA GCAGCGGGAT TGTCATCCTG GTTGGGAATG ACGTCAGCCA CATCTTTGAA
    32221 TGCATGACAG CACTCATCGC ATGAATGGCC AACTGCGCTG CGGATGATTC CCCCATCTCC
    32281 AAGGTACAAG TAGGCAGCGG CCACAAGCTC ACTGATCTTC AGATTGTCCA TGAAGATCAT
    32341 GGTCGAGTTG CTGAAACCTG CAAGTAGGCG GATGGACTCC AAGACAAAGG CTTTCCAGAC
    32401 TTGTCTGTGA GTGAGGGTGA ATGAAGCTCC ACTGGGCTGG ACAAACGAAT AGTTCCAGAA
    32461 CTCCGTTATT GCTGCTGTCA AAGCATGGAA GCTGTAGTTG GCATTCATGA CAGCCTTGGA
    32521 GACAATGCGA TCCACCCAGA CCTGCTTGCC AACTTTGAGG TACTTGGCAT TGGGAAGATA
    32581 GAGTGCGAGT TGTCGATTGT CGTCAATGAA GCTCTCATGG TCTGCCCAGA ACATGGTGGA
    32641 GCACTTGGGA CATCTACCAG CCAATACTGG AACCTTCTCA AAGCACTCAC TTCCACGAAG
    32701 CAAGGTGACT TTGGAGATAT CACGTTCACG GAGGTATTGA GTGAGACCAT GGCCATGACA
    32761 GCCAGCAGTA GAGCAGCCCA TGACAGGAGG GGTGATGATG ATGATAGGCT GAATGGAGGA
    32821 AGTGGAAATG GGAAGGAGTT TGCGACGTAG CTGGCGTTTA TCGTTATGCG TGTAGAGATC
    32881 CAGAGAGTGG CAGAGAGAGT CGATTTTTTT TACCAAGTAT GGTGGTCTGG CTCTTTGCAG
    32941 AACATGATTT GTGGTTGTCG CTGGCCAGAA AGAGAGTATC GAAGACAGTC TCAGCATTTA
    33001 CAGAAGCGTC AGAGGAGCCA GAGCTAGAAG AGCCAGAGGA GTCCATGTCT TCATCAGATC
    33061 CAGAGTTGGA ATTATTGTCA GAGGCATCCA TATTGTCCTC AGAGGACCCA GAGTCTGAAT
    33121 CGACATTGCC AGCACCAGCA TCATCATCAT CAGAGTTGCC AGGGACGTCA GAGACATCAA
    33181 CCTGAAGCTT GTCTTTAATG GCACAAACAA AGGCTGCCAT CCAGCTAGTG ACGACCTGGT
    33241 TGTTACTACT CACAGCCCTC TGCTGGCCAT GCAAGTTGAG AATGTCGGTG TTGGTGGTGA
    33301 TGCTGAAGAG GAGCATCAGG ACTGTGGCCA GACTGATGTT CTCACCAAAG GTCAGCTTGA
    33361 TGACTTTGGC AAAGTCAGCA AATCGGATGT CGGGAAACGG GTCCTCCAGA GGAGCTGCAG
    33421 CAGCACATGG AAGGAGTCCT AGCAAGAAAA GGACGGATAG CACCGTCCAA AGACCCTGTA
    33481 AACAGAAACT GGGCAAGTCA GTATTTGTCG AAATGCATTG AAGTTCAAAC GAAAAAGAAC
    33541 AAGTGAAATG ACTGTTGCAT TTACACTAAT ACAAAGAGTA AGCTACCTAC TTTGTAGCCT
    33601 TCTTAGCTGC AGACTTCTTC TTTGCCTCTT TGGCCTTCTT GGCCTTCTCA GCAACAACTT
    33661 TTGCCTCCTC TGCTGCAAGC TCTGCCTCCA ACTCATCCAG AACCTTCCCC AGAGTCATCC
    33721 TGCCAACTTC ACGACCTCCC CAGACCTTTG TATGAGCCTC AGACGTAAAG TCGTAGTCGG
    33781 GGTTCTGCAA CATGTCCATG AGCATGGGGA ACTTGAGACA GCGTTTGAAG AGGGCTCCAT
    33841 AGGTGCCGAA GTTTGTCCTC TTGATGAAAA TGGAGCGAAG GACAGCCTCC TCAACAGGAG
    33901 CTCCATCCCA TGGAGTGGTG AGCCTGTTCC ACTTGGCCAT GGCGCCTACA GCAAGCTGAT
    33961 AGCGGGCATA CATGTTGACC AGACCACCAT TACCCTTGCC ACTGTTGGTC ATATGGAGTG
    34021 GCACCTCCAT ACGAGTAGCA ATTCGTAGAA GAAGAGGGTC GTTGGGGAAG GCAGTGATGA
    34081 GGCTGTTGAC GGGAGTGGTG GAGGTGCCAG CGACGGAGAT GGAAGCGGAG GGGGCGATGG
    34141 AGGAGACTGC TGAGGAAGCA GAAGTGGAGT TGATGGAGGG GGAGGGAGGC AGAAGGTAGG
    34201 AGAGGTTAAC CTCAGATGGT TGCTGAAATG GTGTCAGAAT TTTTTCAAGT CAAGTCGGAA
    34261 TTTACGTACA ATTCCAATTC TGAGTATATT CTCATCATCC CAAATGGCAG CCTCATTGTC
    34321 GCCGACAGCA ATGGCGTAGG GGCCCTTTAC TTCCCACATG AGGGTCTTAG CATCCCAGAG
    34381 AAGGATGTCA GAGCCTGTTG GCAACCAATA AGTCAAAAAT GCGAAGTAGA AAGAAGAAAC
    34441 TTACTAATAA GGGCCACCAT CTTCTTGGCA GCAGCGGTGA GGACAGGCCC CAGAGTGTTC
    34501 TTGATGGGGA CTTTCACCGC AAGAGGTGTG GGACCCTCCA GAGGCGATGC CCCATTCTTG
    34561 AAGACATTGT TGAAGTGATG TGCACACTTG TTGTACAAAT GTATAACAAA GTTGCGCTAT
    34621 ACTAAGCGCC CGGTTCCCAC GCATTGGGGA CCATCCATAG ACACTGCCAA CACCCATTGG
    34681 GACGACCCAG GTCATCATGG GATGACCGGT GTTGACAGGA TTGCTAAAAG TGCGCAAGCA
    34741 CTGTTTAGCA ATCTGTACAT ACTTTATAAG CACACGACTC CCACGGTCAA TGCAACGTTC
    34801 CCACGTTCAG CGCCCCATTA GTAGGTCTGT TGACCTCTAT TGTGACCGCC GGAACAGGCA
    34861 CCGGAACGCC TCGGTCTCCG CAGGGAAGCA AAAGGAGCGA AAATGAAACA TGGAGCCATC
    34921 ATTAGATTGA TGTCTGGCAT GTTCCCAAGC TGCTCCGGAG CTAATCAAAT TCGGACGCGA
    34981 TTTAGTGGAC ACCTATATTC ACGCCTCGCG CAGAACAGTA CCCGTGGGAA CCTGGGATGG
    35041 TCATTTTCCA TACATGTCTA GAGTAATAGA CACAAAGAGT CAATAGAGCG CAAATCATTA
    35101 CATATTATTG ATTGATTGCA TCAACATCAT TAGTGATTGT TACCAAGGCA ATTAGAGTGC
    35161 ATTAGGACGC TTCTACAAGC TTCTGATCAG ACTATAATAG CCTATAGTTT AACAGACATG
    35221 AACCATGCCC ATGACAGGCG GGGCATCAGA CTCCATGTTG GTGTCTGAAT ATCAAGTCAG
    35281 AATTGAACTT GATAGCAAAA GAGAGAACTC ACCAAAGTCA GCCATGTTGA GGGCAACACC
    35341 CATGGCCTTG CCTCTAGCGA CACCACCCAT GGTGCGGGAT GCACCTTGCA AATCCTCAAG
    35401 GGTCGTCAGA CGTGGGAGAG GGAGAAGCTC GACTGGAAGA AGCACTGGCA TGGGTGATGC
    35461 CCTTGCGCAA ACCCTTACCC ATCTGACGAG TGGTGGTGGG CGAAGTGCTG GCCCTGCGCT
    35521 TGGA
//
